# Supplementary material for: RNAmotifs: prediction of multivalent RNA motifs that control alternative splicing
Source: Springer Nature journal article supplement (doi:10.1186/gb-2014-15-1-r20), 2014-01-31

Define 3 regions of interest around the alternative exons  
 R1 = [ -35 : -5 ] nts from 3'ss  
 R2 = [ 1 : 31 ] nts from 3'ss and [ -31 : -1 ] nts from 5'ss  
 R3 = [ 10 : 40 ] nts from 5'ss

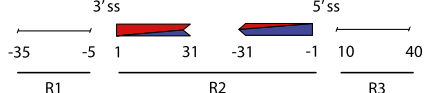

Evaluate the cluster instance of a tetramer in all enhanced, silenced and control exons.

Evaluate statistic significance of region-specific enrichment of each tetramer in alternative exons versus controls using a Fisher's Exact test. Correct p-values with Benjamini-Hochberg FDR correction ( $p_{fdr}$ )

Calculate the p-values ( $p_{bootstrap}$ ) of each tetramer using the same procedure as described above in 10,000 bootstrap samples of our data, and then estimate empirical p-values of tetramer enrichments

$$p_{empirical}(r,t) = \frac{1 + \#(p_{bootstrap}(r,t) < p_{fdr}(r,t))}{1 + \# bootstrap}$$

Retain tetramers with  $p_{fdr} \leq 0.1$  and  $p_{empirical} \leq 0.0005$  in R1, R2 or R3 and draw the RNA splicing maps on the basis of the *enrichment score* (ES).

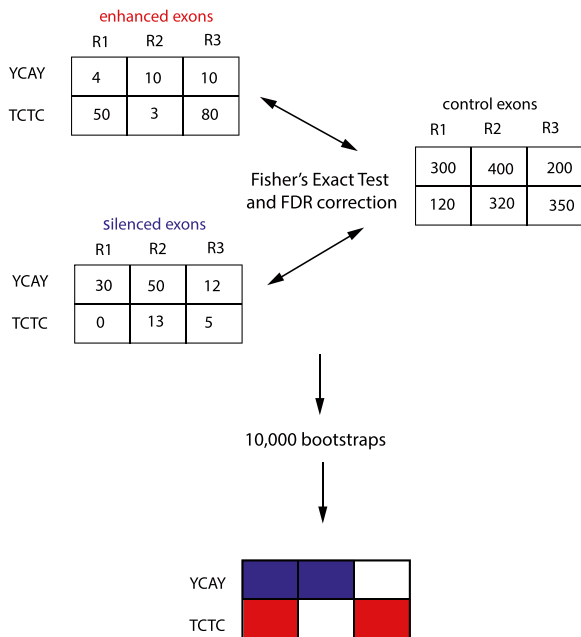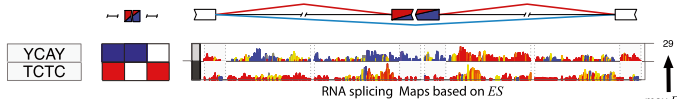

Supplement: 13059_2013_3232_MOESM7_ESM.pdf [file 13059_2013_3232_MOESM7_ESM.pdf]
