# Supplementary material for: RNAmotifs: prediction of multivalent RNA motifs that control alternative splicing
Source: PubMed Central journal article supplement (PMC4054596; doi:10.1186/gb-2014-15-1-r20), 2014-01-31

Nova hnRNPC PTBP1 TIA1 TARDBP Mixed Brain Heart

Tetramer

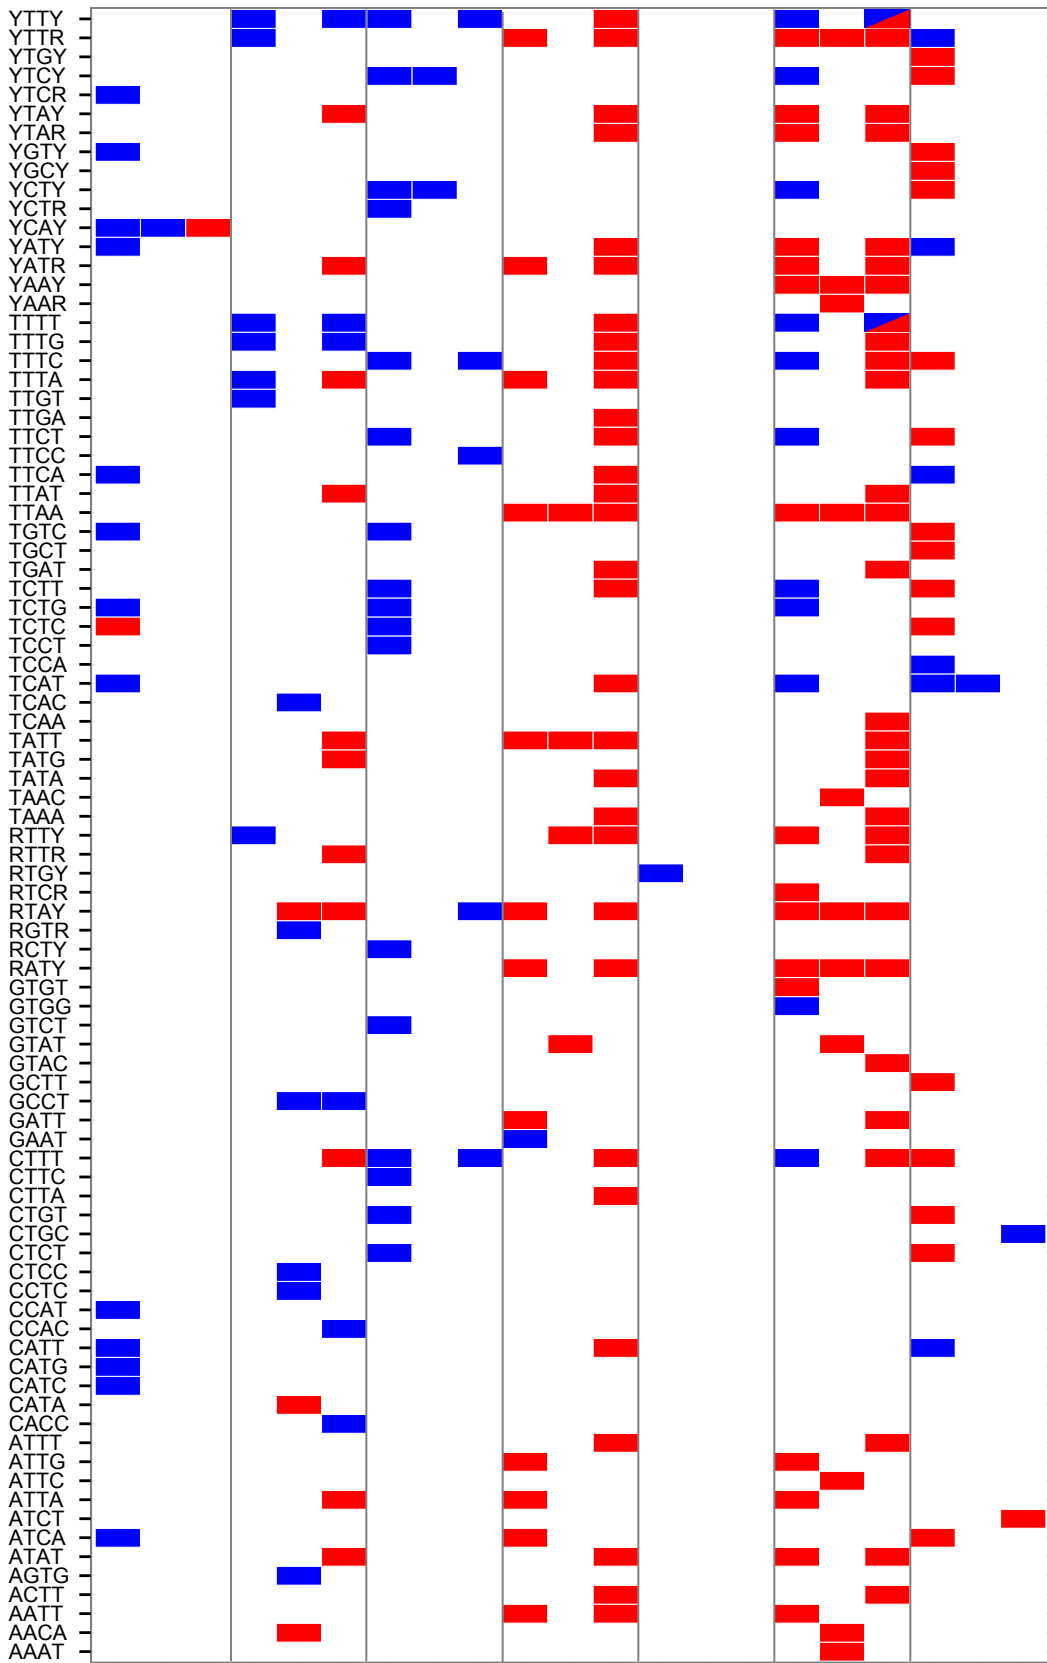

Enriched in:  
■ Enhanced Exons  
■ Silenced Exons  
■ Enhanced/Silenced Exons

R1 R2 R3 R1 R2 R3

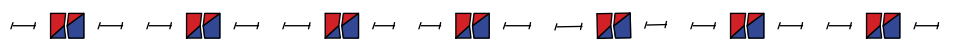

Supplement: gb-2014-15-1-r20-S4.pdf [file gb-2014-15-1-r20-S4.pdf]
